# Supplementary material for: The Cost of Reducing Municipal Unsorted Solid Waste: Evidence from Municipalities in Chile
Source: MDPI journal article supplement (doi:10.3390/su13126607), 2021-06-10
Supplement: s1 [file s1]

## SUPPLEMENTARY MATERIAL

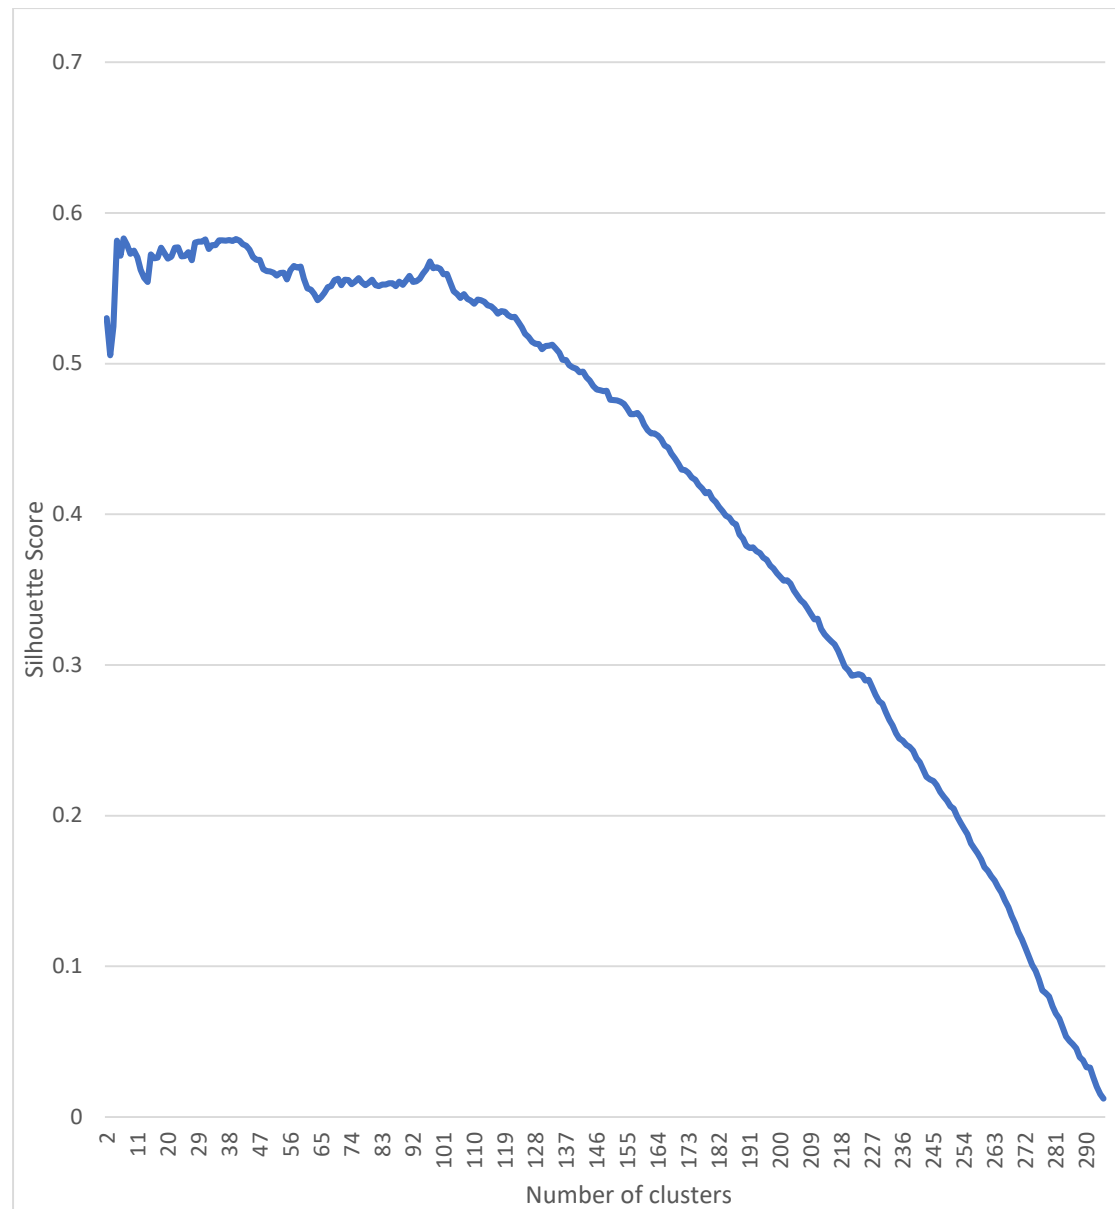

**Figure 1.** Silhouette score

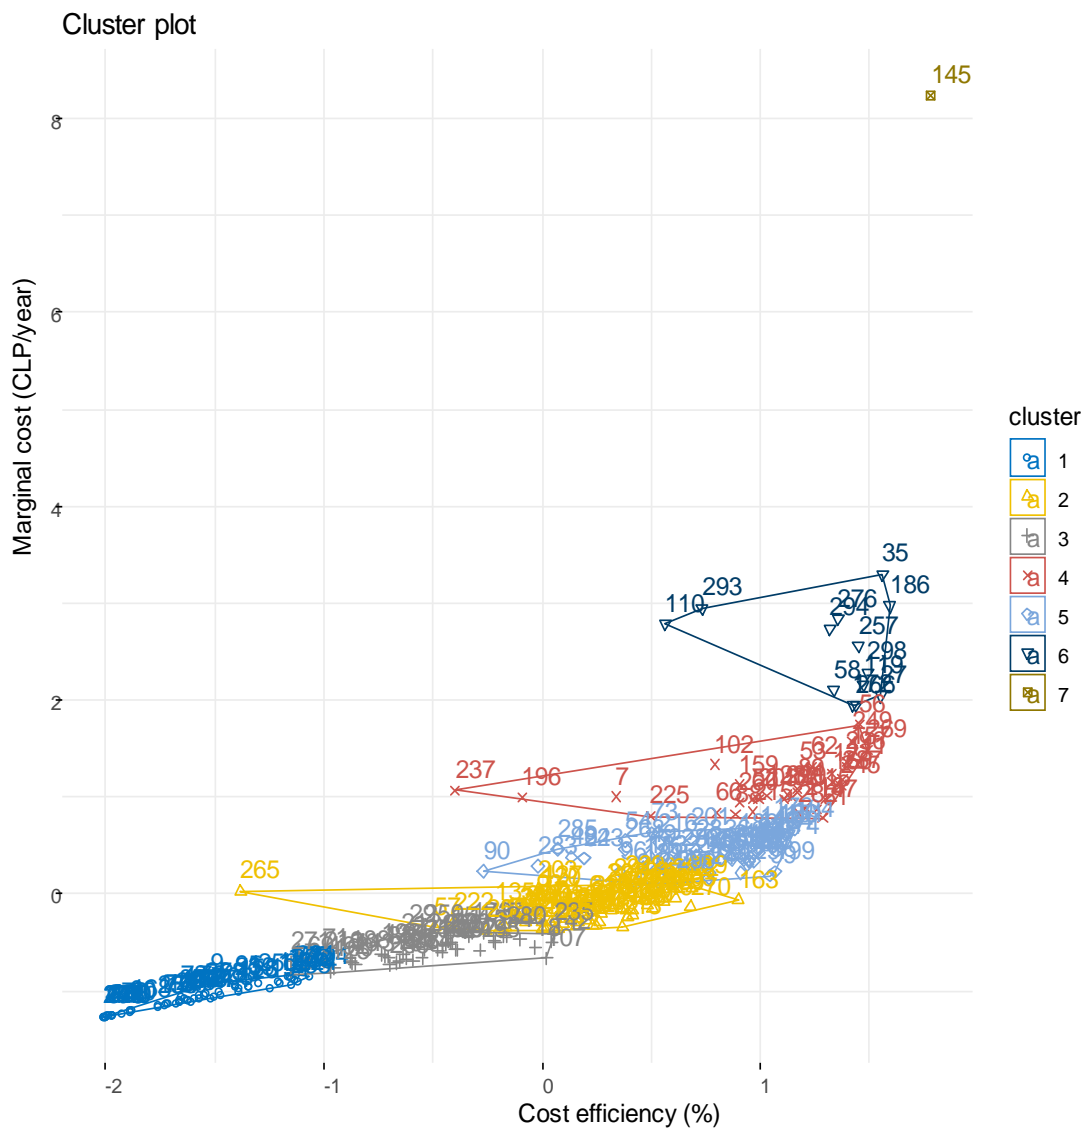

**Figure 2.** Cluster analysis based on cost efficiency and marginal cost of reducing unsorted waste.
